# Supplementary material for: Development of Nanofibers with Embedded Liposomes Containing an Immunomodulatory Drug Using Green Electrospinning
Source: MDPI journal article supplement (doi:10.3390/pharmaceutics15041245), 2023-04-14
Supplement: s1 [file s1]

Supplementary Material

# Development of Nanofibers with Embedded Liposomes Containing an Immunomodulatory Drug Using Green Electrospinning

Luca Casula <sup>1,2</sup>, Anže Zidar <sup>2</sup>, Julijana Kristl <sup>2</sup>, Matjaž Jeras <sup>2</sup>, Slavko Kralj <sup>2,3,4</sup>, Anna Maria Fadda <sup>1</sup> and Špela Zupancič <sup>2,\*</sup>

<sup>1</sup> Unit of Drug Sciences, Department of Life and Environmental Sciences, University of Cagliari, Via Ospedale 72, 09124 Cagliari, Italy; luca.casula@unica.it (L.C.); mfadda@unica.it (A.M.F.)

<sup>2</sup> Faculty of Pharmacy, University of Ljubljana, Aškerčeva Cesta 7, 1000 Ljubljana, Slovenia; anze.zidar@ffa.uni-lj.si (A.Z.); julijana.kristl@ffa.uni-lj.si (J.K.); matjaz.jeras@ffa.uni-lj.si (M.J.); slavko.kralj@ijs.si (S.K.)

<sup>3</sup> Department for Materials Synthesis, Jožef Stefan Institute, Jamova Cesta 39, 1000 Ljubljana, Slovenia

<sup>4</sup> Nanos SCI, Nanos Scientifcae d.o.o., Teslova Ulica 30, 1000 Ljubljana, Slovenia

\* Correspondence: spela.zupancic@ffa.uni-lj.si; Tel.: +386-1-4769500

**Table S1.** Composition and characteristics of liposomes with different concentrations of P90G and SIM, in terms of average diameter (nm), polydispersity index (PI), and encapsulation efficiency (EE, %). Samples indicated with “not measurable” showed high values of PI or macroscopic aggregates/precipitates and thus, were not suitable for DLS and/or EE% measurements.

| FORMULATION OF<br>P90G+SIM<br>(both in mg/mL) | AVERAGE<br>DIAMETER (nm) | PI          | EE (%)         |
|-----------------------------------------------|--------------------------|-------------|----------------|
| 60 + 10                                       | 55.7 ± 3.7               | 0.19 ± 0.01 | 96 ± 12.7      |
| 60 + 15                                       | 326 ± 30.6               | 0.45 ± 0.07 | 57.1 ± 9       |
| 60 + 20                                       | 533.1 ± 72.4             | 0.95 ± 0.08 | not measurable |
| 80 + 10                                       | 50.4 ± 1.9               | 0.27 ± 0.01 | 100.8 ± 1.9    |
| 80 + 15                                       | 101.9 ± 26.6             | 0.26 ± 0.01 | 99.3 ± 1.9     |
| 80 + 20                                       | 473.6 ± 114.5            | 0.96 ± 0.1  | not measurable |
| 100 + 10                                      | 48.7 ± 1.8               | 0.33 ± 0.03 | 93.7 ± 3.6     |
| 100 + 15                                      | 47.5 ± 0                 | 0.28 ± 0.01 | 95.7 ± 2.4     |
| 100 + 20                                      | 65.1 ± 0.8               | 0.19 ± 0.01 | 96.1 ± 5.1     |
| 100 + 25                                      | not measurable           |             |                |
| 120 + 20                                      | 129.9 ± 18.2             | 0.29 ± 0.1  | 92 ± 2.1       |
| 120 + 25                                      | not measurable           |             |                |
| 120 + 30                                      | not measurable           |             |                |
